# Supplementary material
Source: publisher figshare collection journal article supplement (https://sage.figshare.com/ndownloader/files/17855423)
Supplement: Supplementary file 1 [file 17855423]

Reviewer 1 v.2

Comments to the Author

Nice work and thank you for your response
